# Supplementary material
Source: Springer Nature journal article supplement (https://www.springermedizin.de/resource/supplementary/12936_2011_1909_MOESM3_ESM.pdf/9542042)
Supplement: MOESM3 [file 9542042]

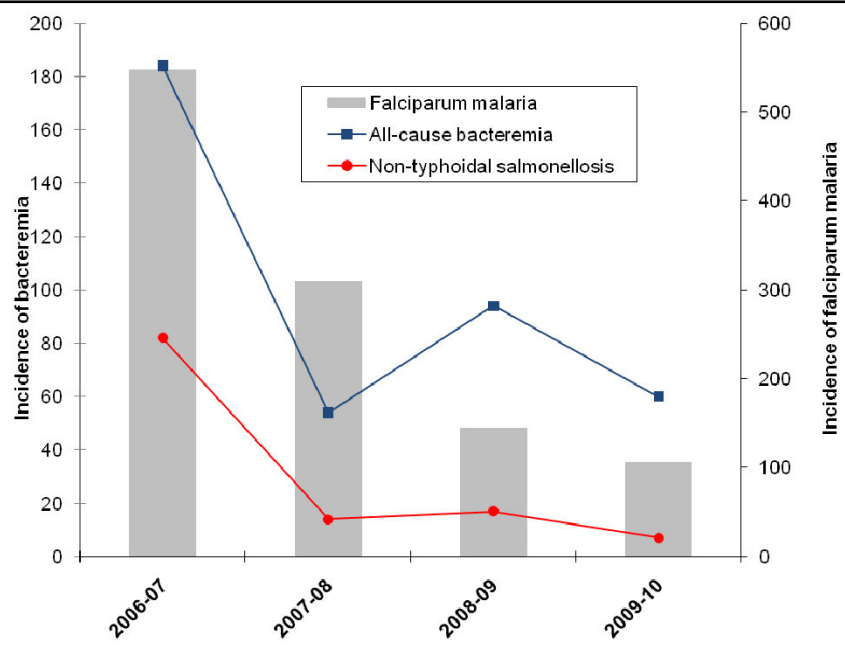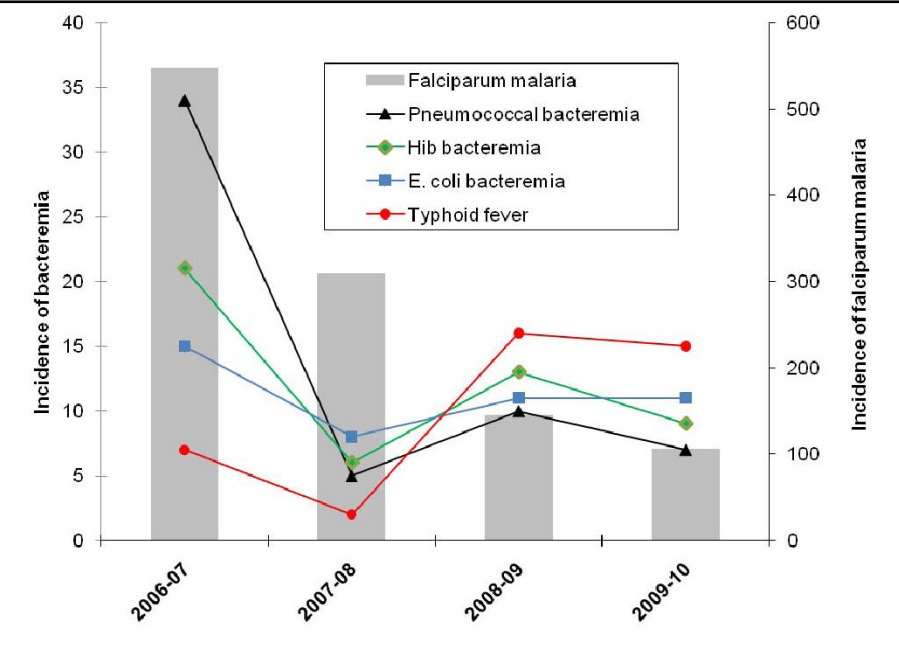

| Year                           | Population under 15 years** | Number (incidence) of:        |        |                           |       |                   |       |                   |      |               |      |                      |      |                |      |                 |      |
|--------------------------------|-----------------------------|-------------------------------|--------|---------------------------|-------|-------------------|-------|-------------------|------|---------------|------|----------------------|------|----------------|------|-----------------|------|
|                                |                             | Enrolled children from Muheza |        | Severe falciparum malaria |       | bacteremia        |       | NTS               |      | Hib           |      | <i>S. pneumoniae</i> |      | <i>E. coli</i> |      | <i>S. typhi</i> |      |
| 1 June 06 - 31 May 07          | 121,465                     | 2447                          | (2015) | 664                       | (547) | 224               | (184) | 100               | (82) | 26            | (21) | 41                   | (34) | 18             | (15) | 8               | (7)  |
| 1 June 07- 31 May 08           | 122,847                     | 791                           | (644)  | 379                       | (309) | 66                | (54)  | 17                | (14) | 7             | (6)  | 6                    | (5)  | 10             | (8)  | 2               | (2)  |
| 1 June 08 - 31 May 09          | 124,322                     | 1155                          | (929)  | 180                       | (145) | 117               | (94)  | 21                | (17) | 18            | (14) | 13                   | (10) | 14             | (11) | 20              | (16) |
| 1 June 09 - 31 May 10          | 125,819                     | 888                           | (706)  | 133                       | (106) | 75                | (60)  | 9                 | (7)  | 5             | (4)  | 9                    | (7)  | 14             | (11) | 19              | (15) |
| <b>Test for temporal trend</b> |                             | <b>&lt;0.0001</b>             |        | <b>&lt;0.0001</b>         |       | <b>&lt;0.0001</b> |       | <b>&lt;0.0001</b> |      | <b>0.0017</b> |      | <b>&lt;0.0001</b>    |      | <b>0.5646</b>  |      | <b>0.002</b>    |      |

\* Includes Mkinga which was split-off from Muheza in 2007.

\*\*2006, 2007, 2008 and 2009 population projected from the 2002 Tanzania Population and Housing Census [35]
